# Supplementary material
Source: PubMed Central journal article supplement (PMC2916271)
Supplement: supp_78_8_3432__1.pdf [file supp_78_8_3432__1.pdf]

**S1:**

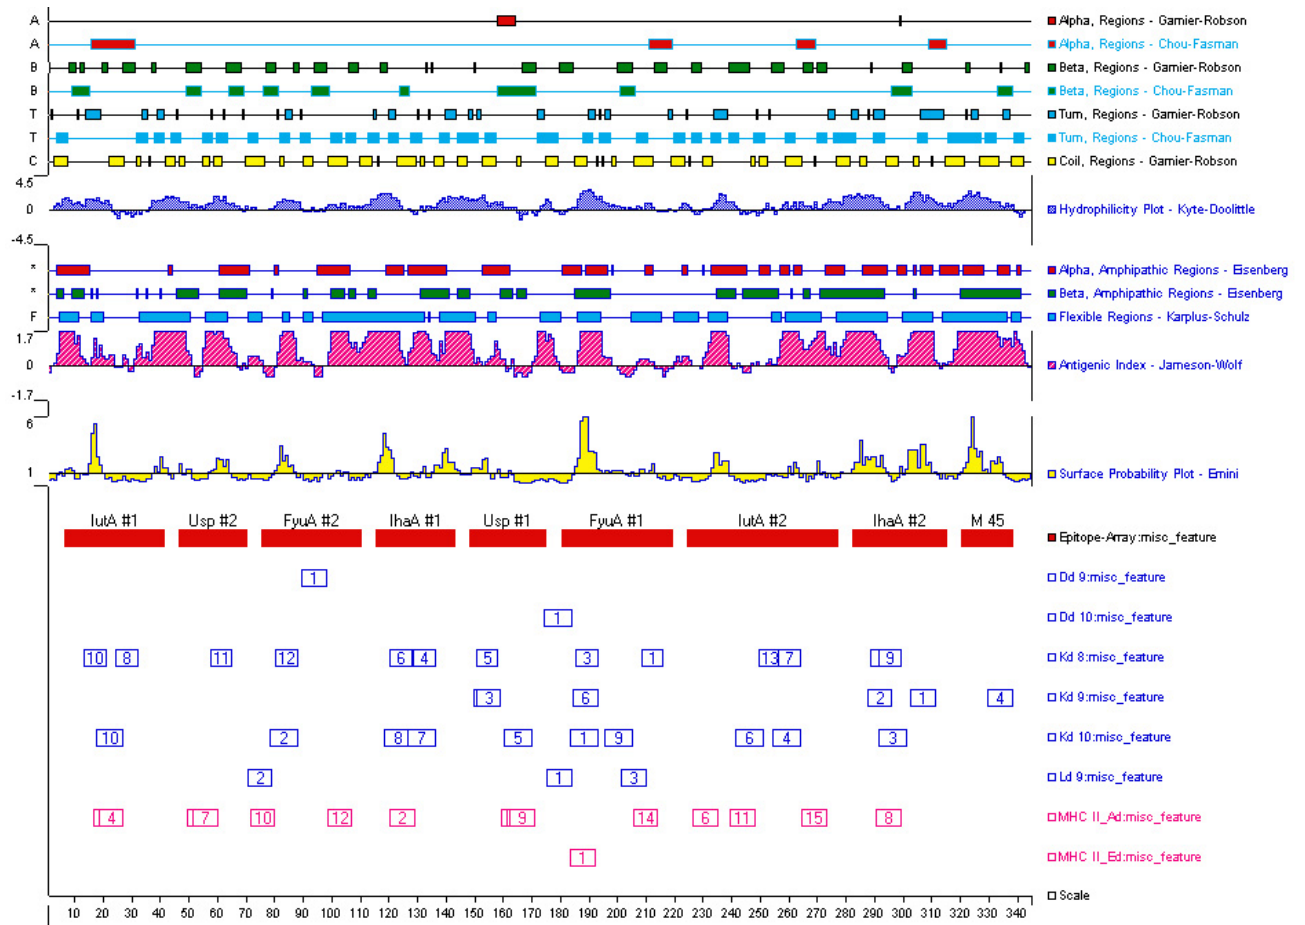

**Vol1**

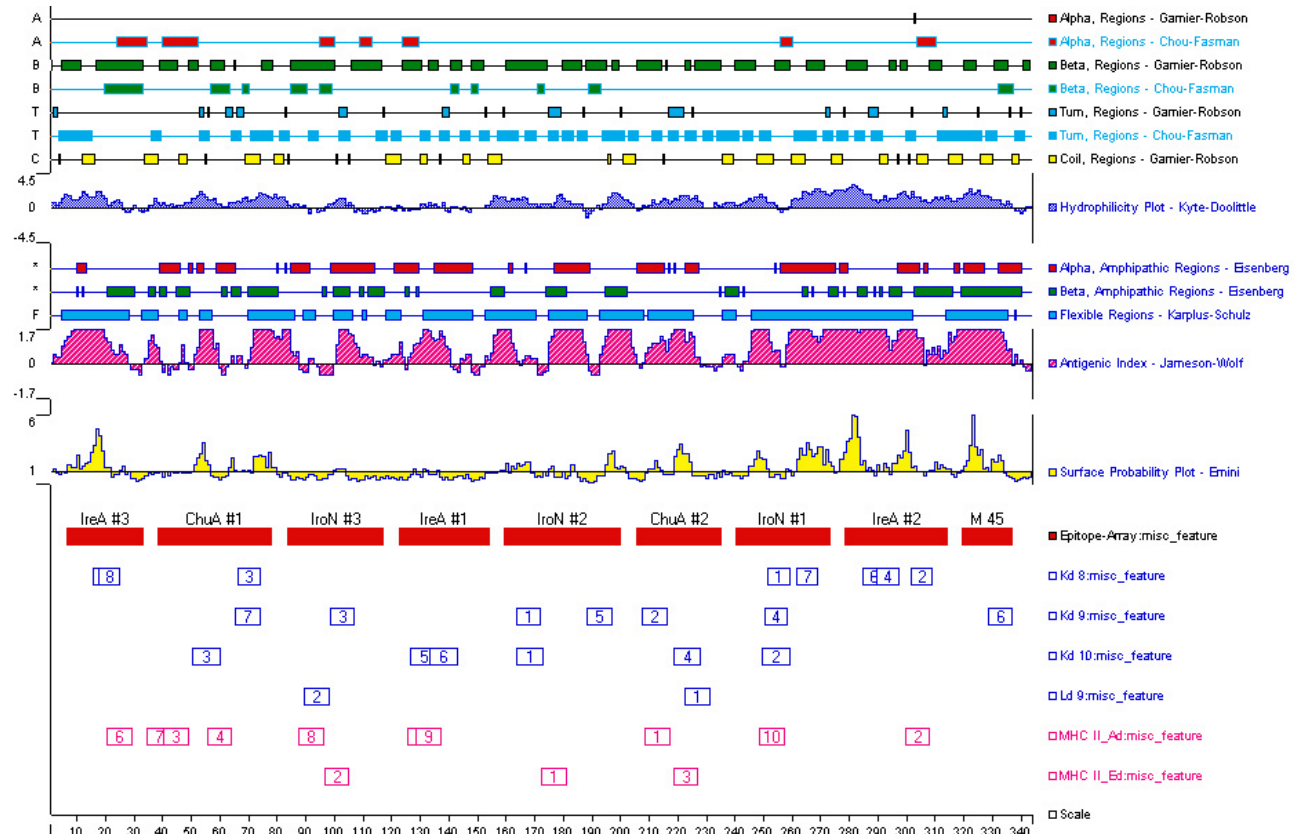

Vol2

S2:

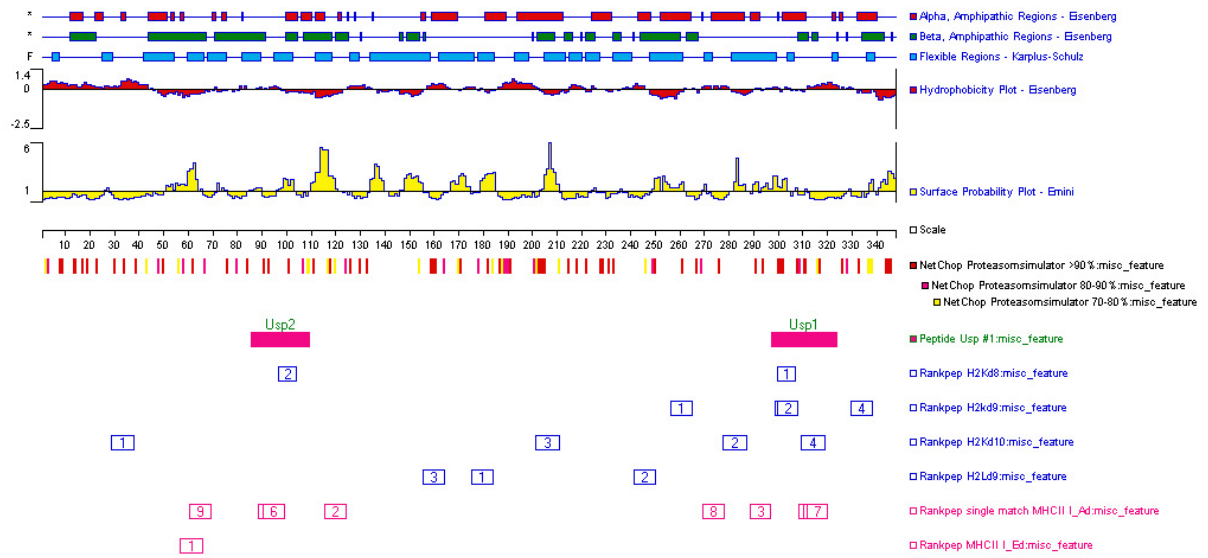

UspA

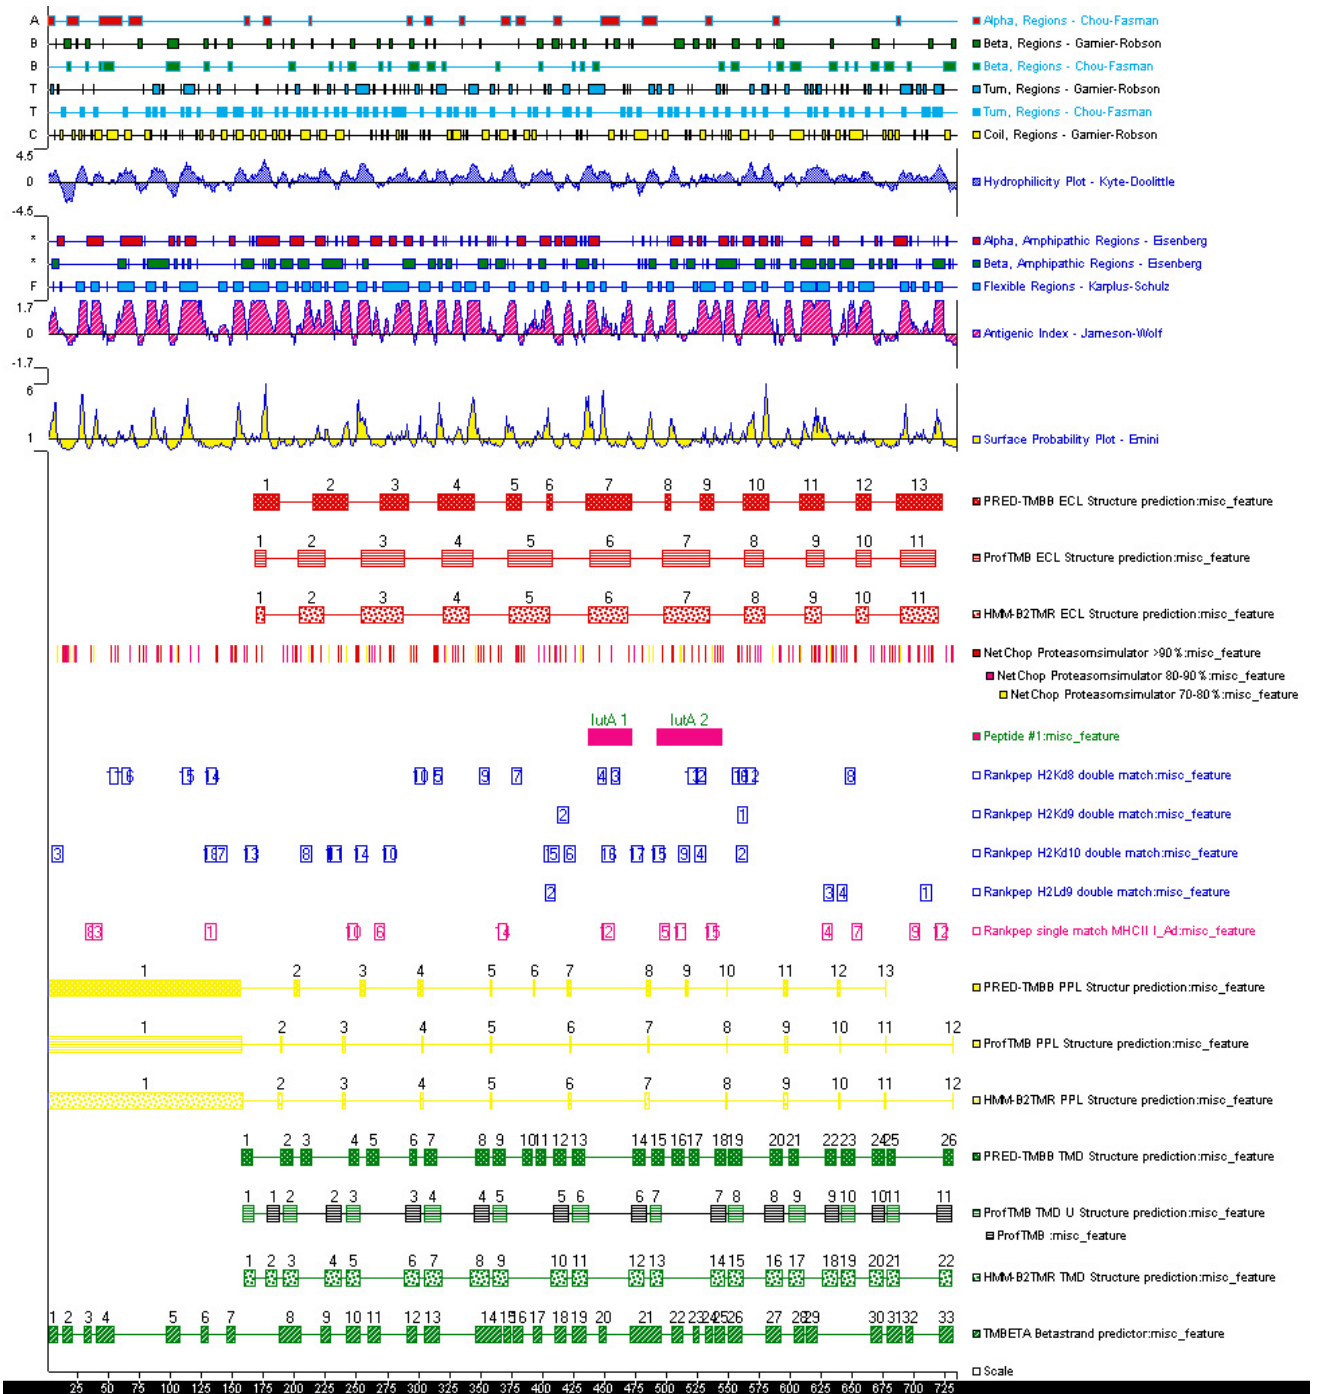

**IutA**

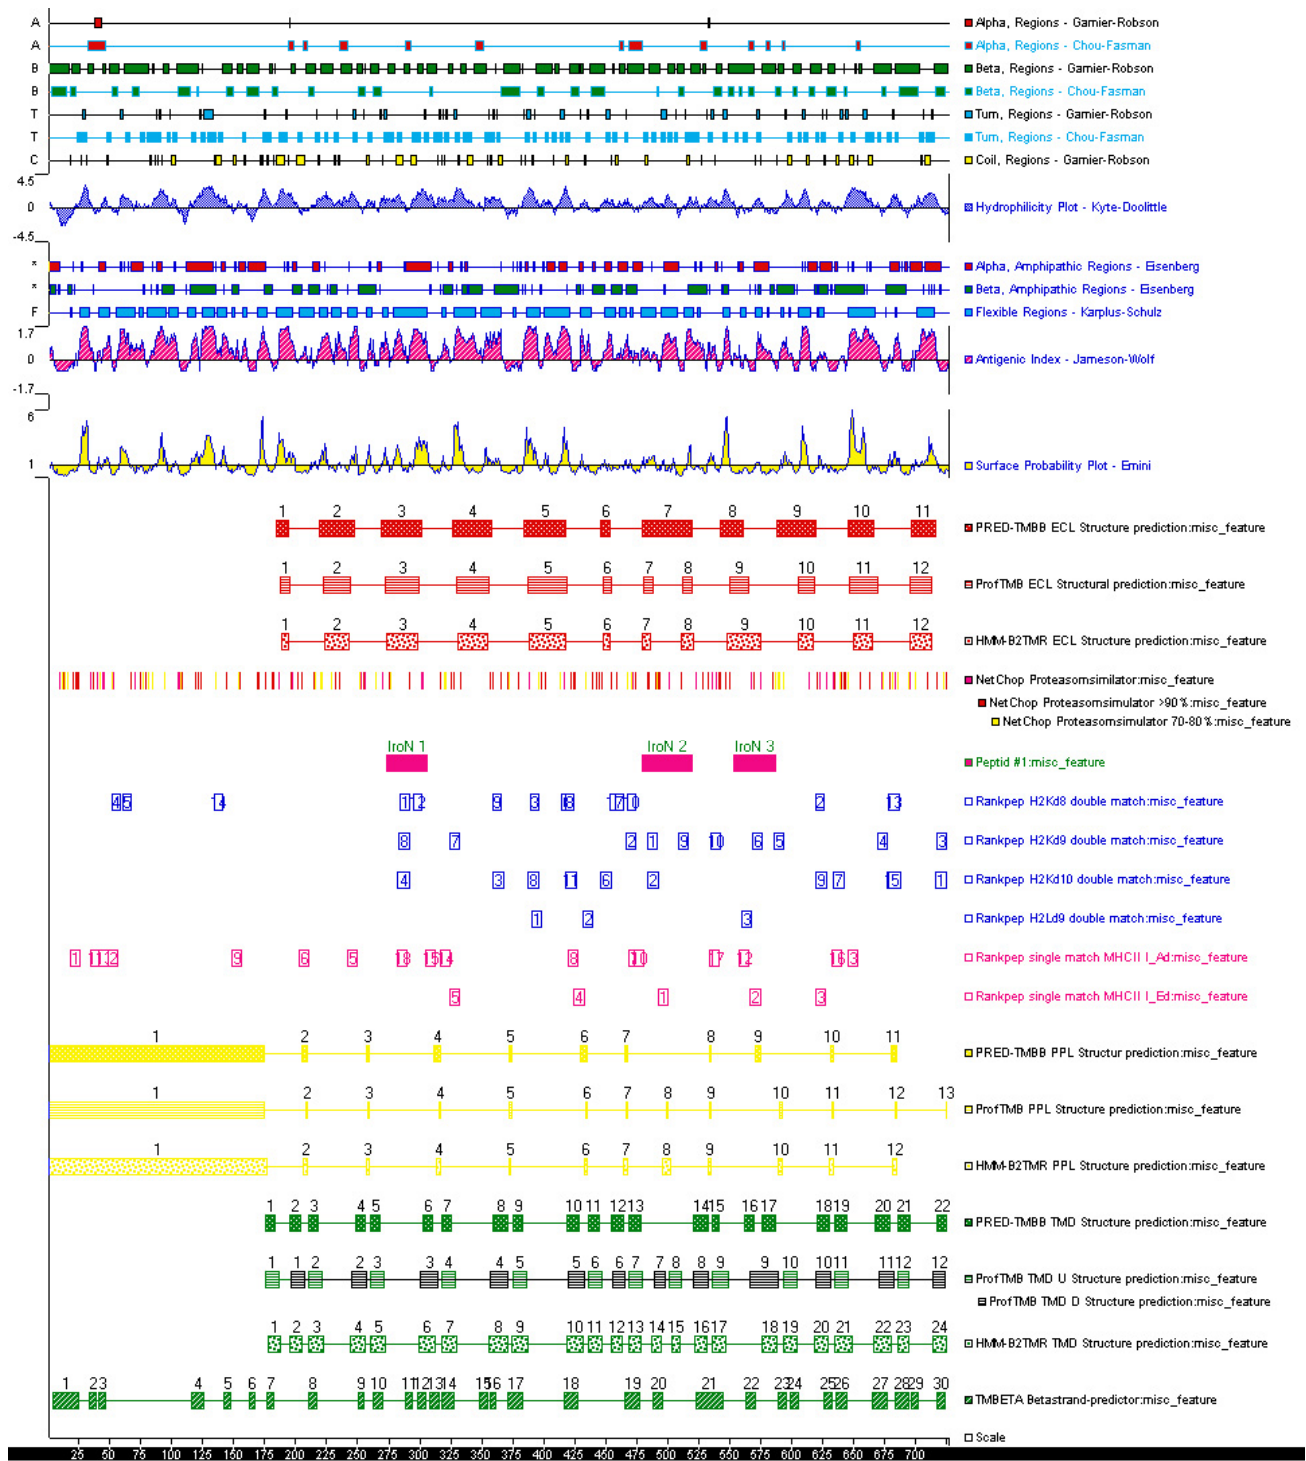

## IroN

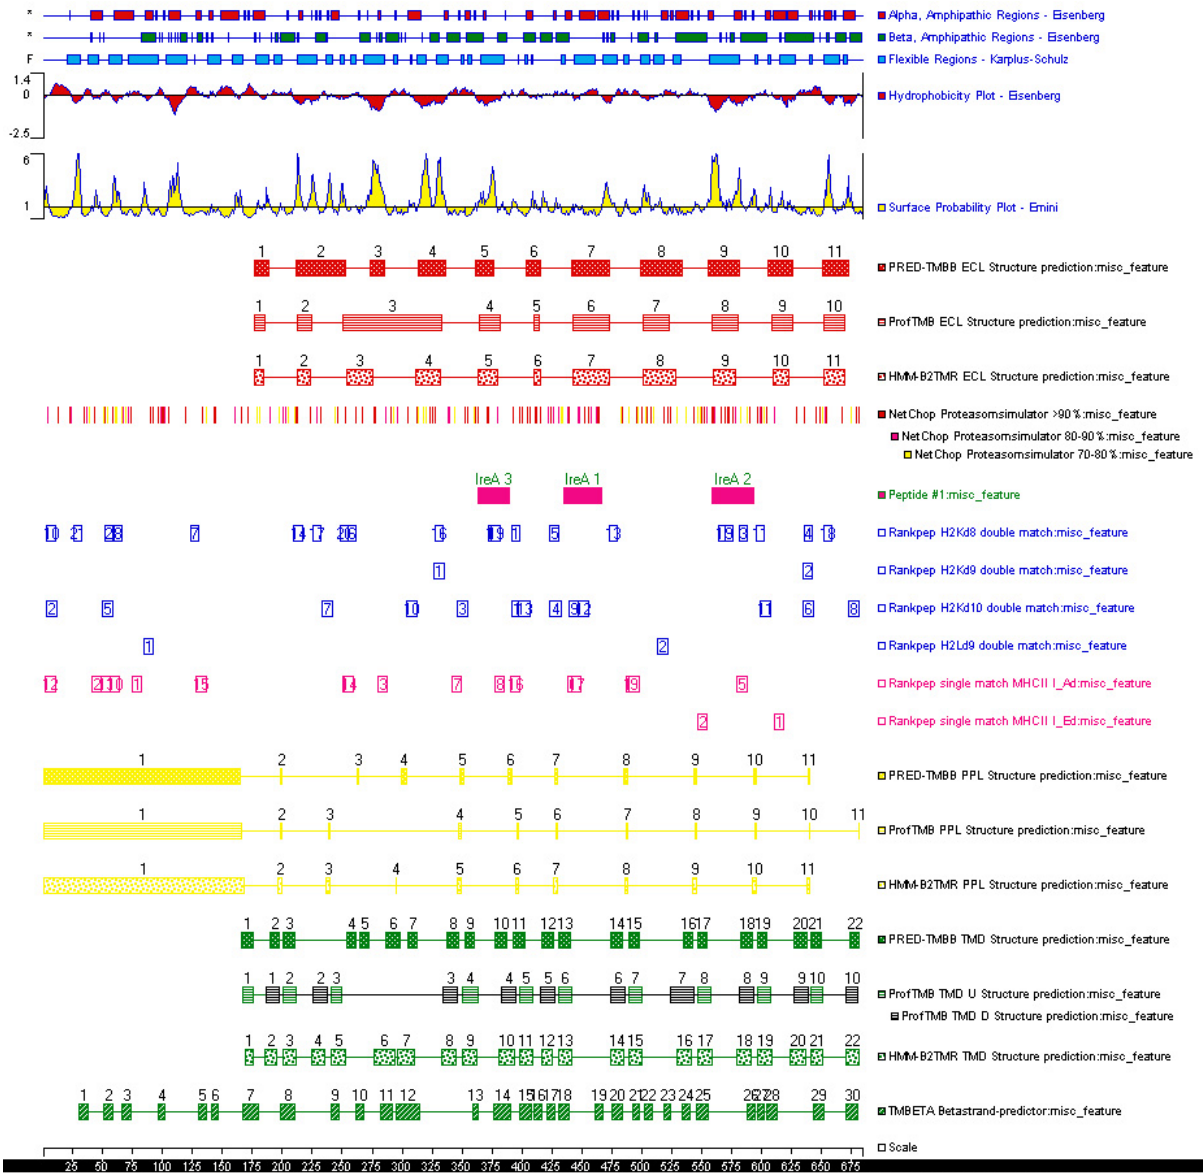

# IreA

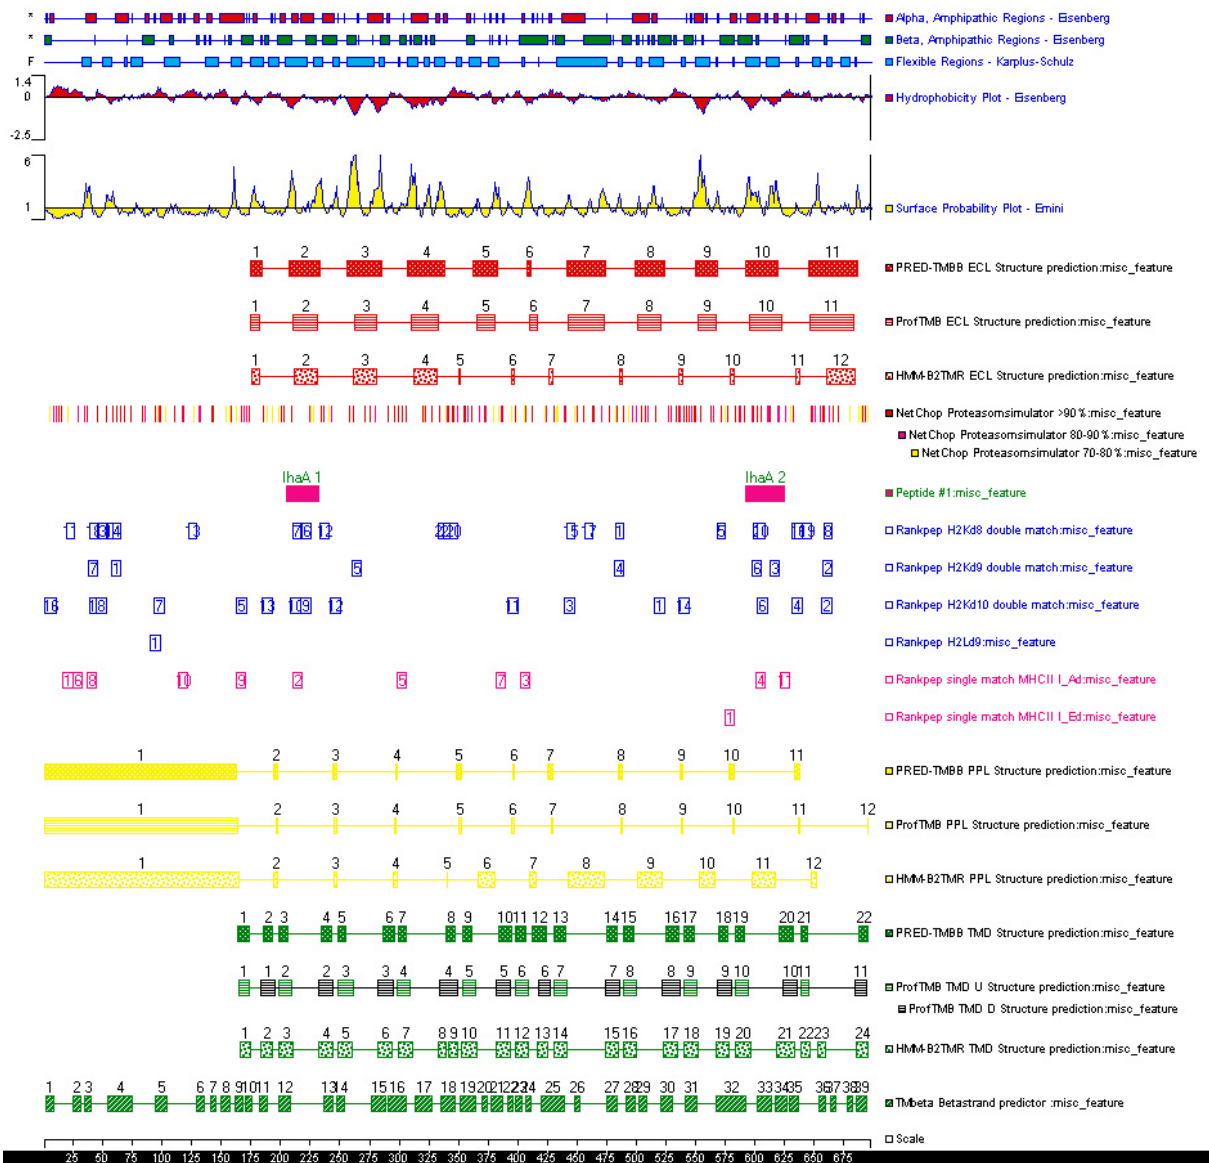

## IhaA

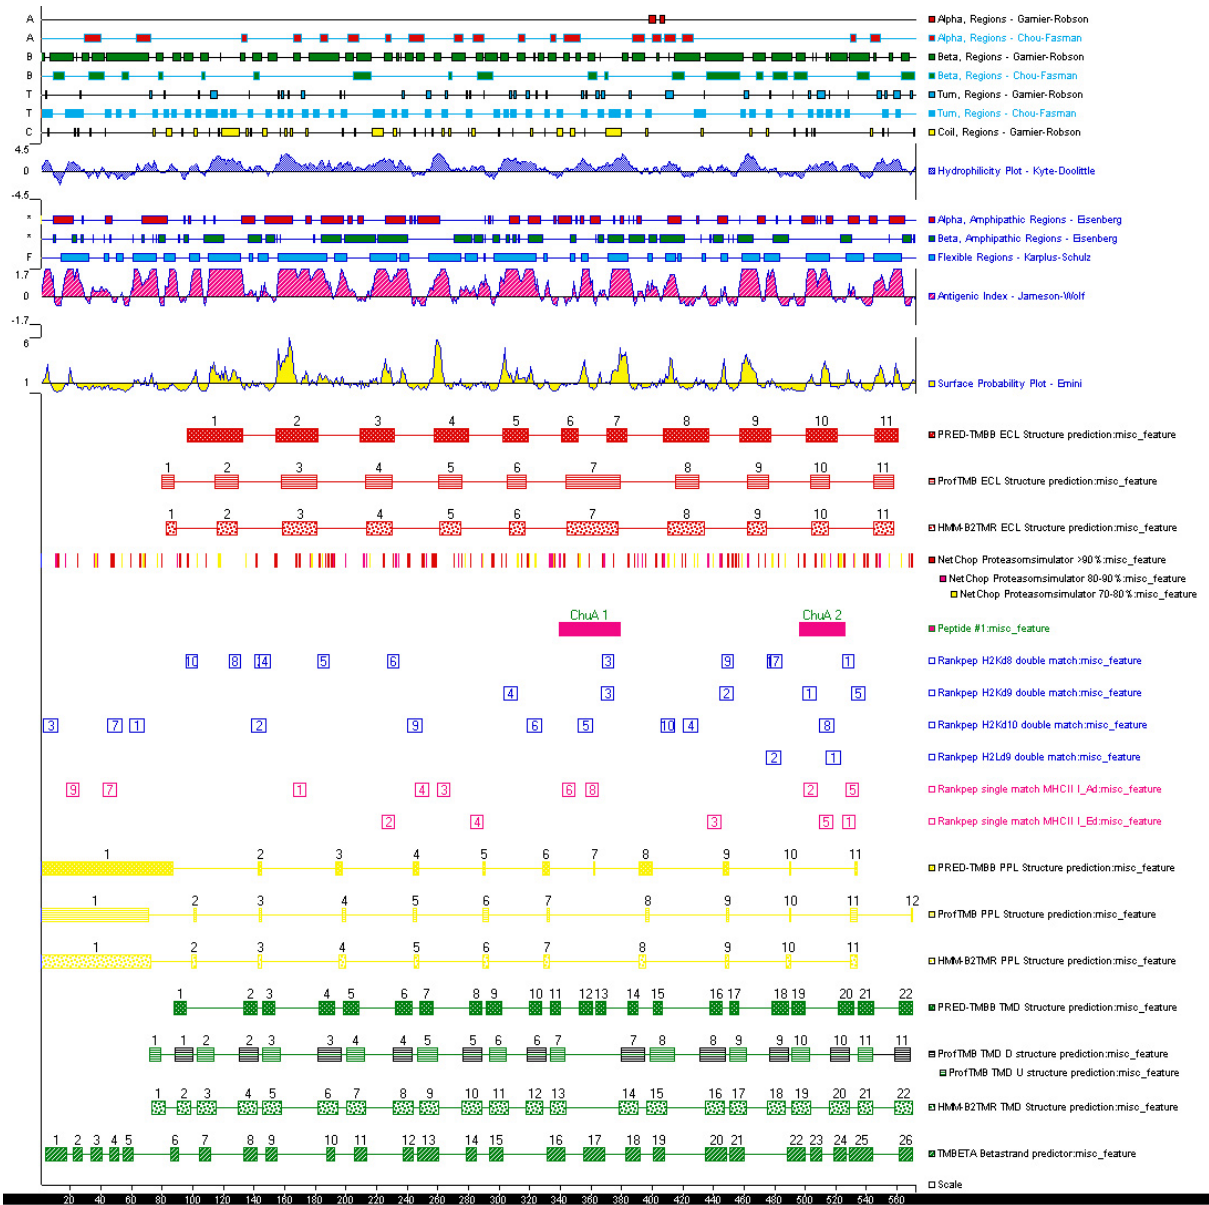

# ChuaA



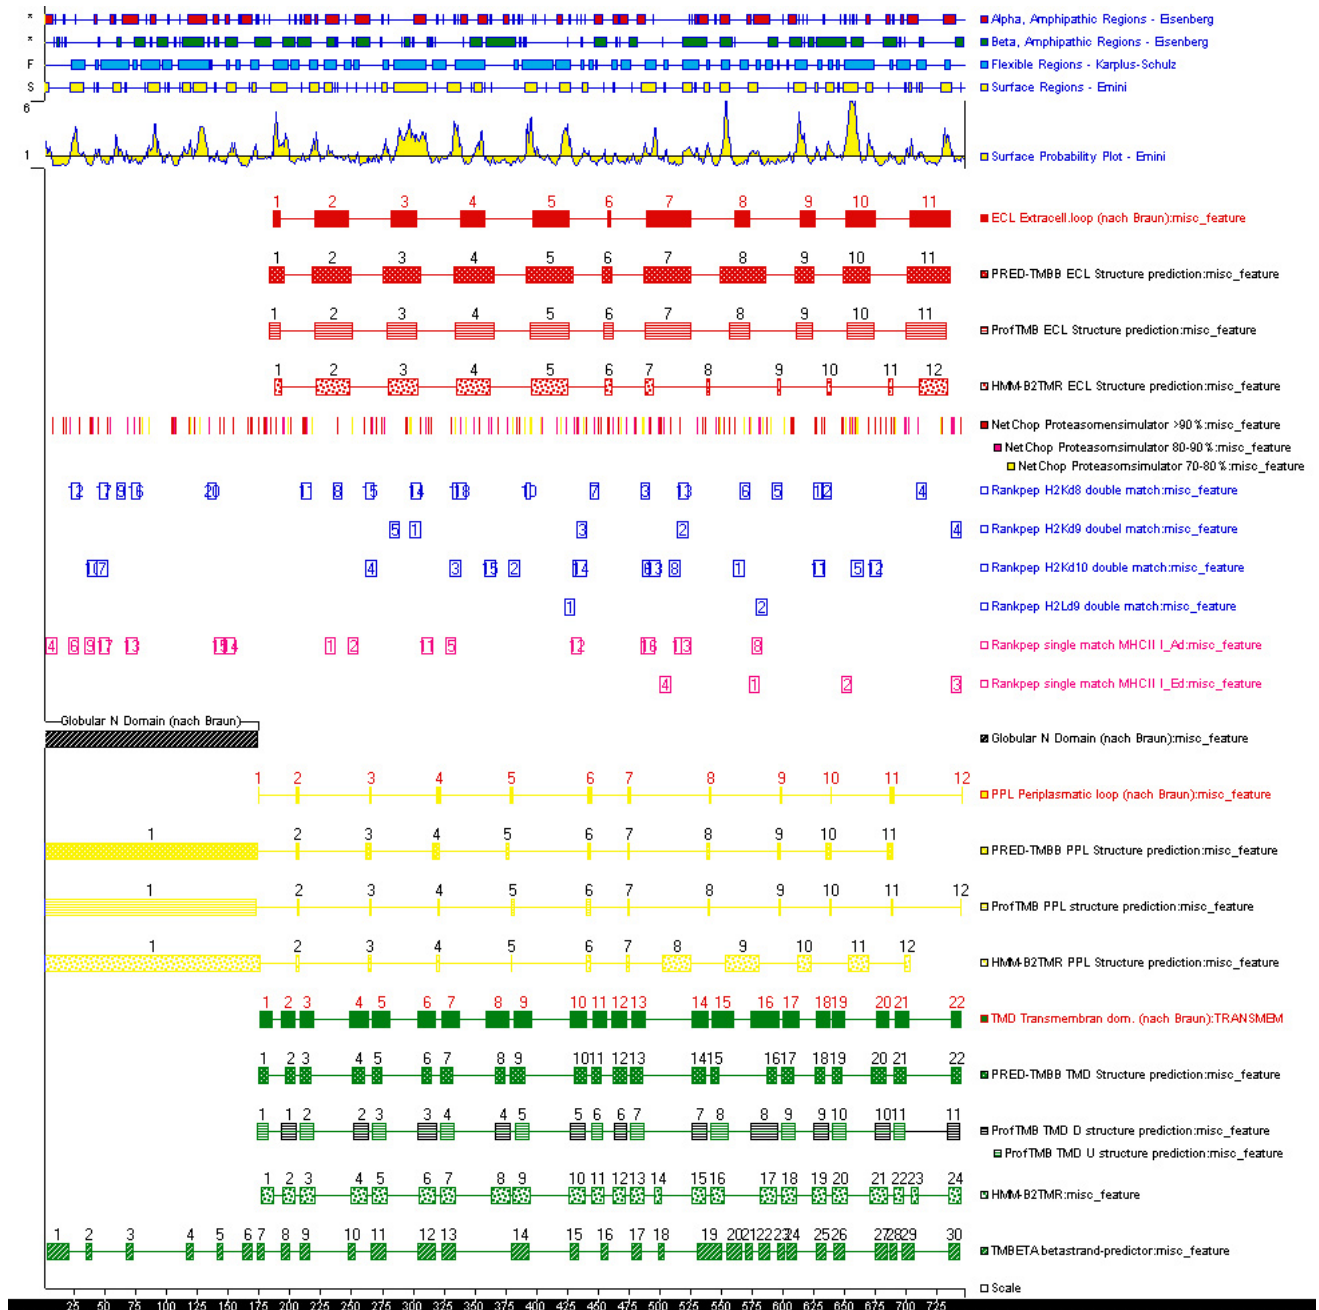

## FepA

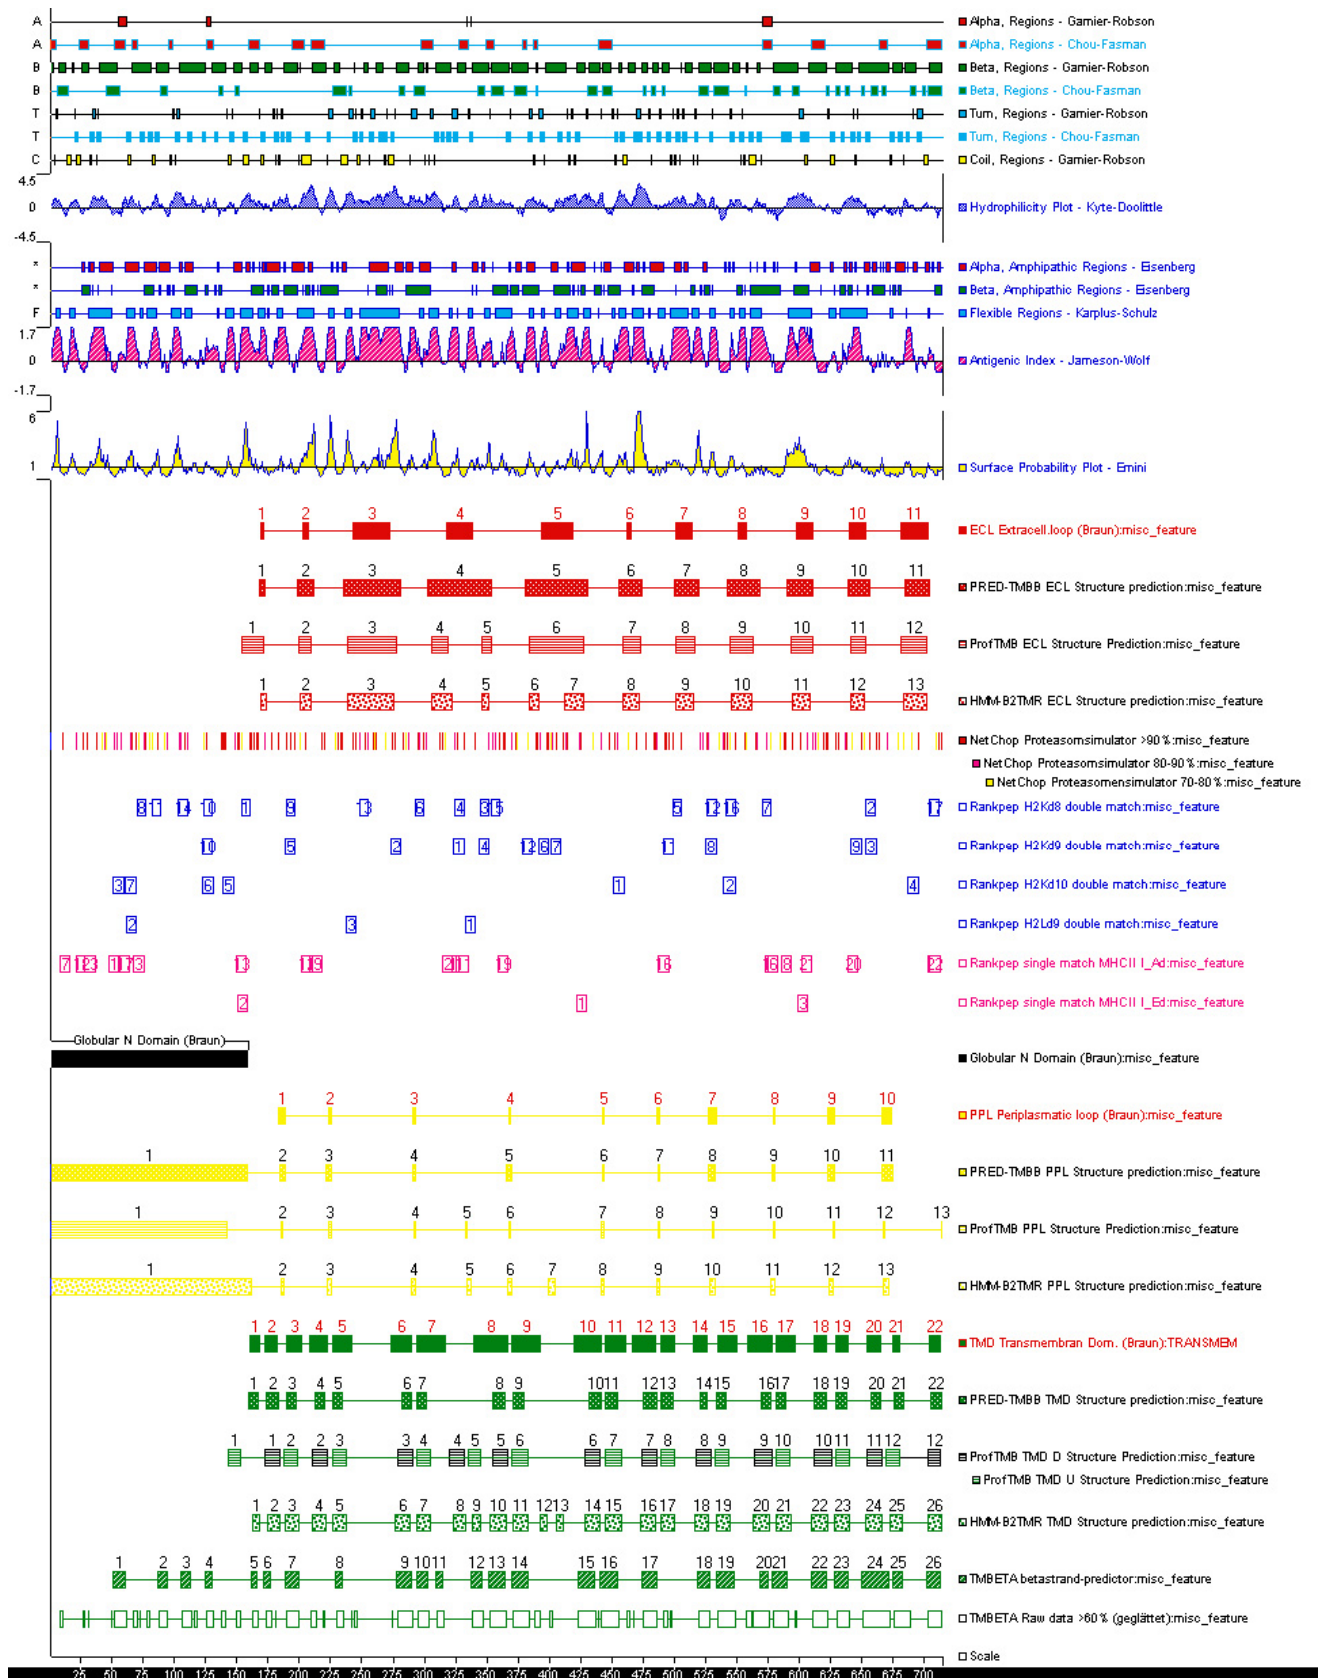

**FhuA**

**S3:**

| Properties of vaccine proteins                | Vol1:       | Vol2:       |
|-----------------------------------------------|-------------|-------------|
| Molecular weight:                             | 36172.11 Da | 36116.96 Da |
| AA-residues                                   | 343         | 342         |
| Basic AA: Lys, Arg                            | 32          | 37          |
| Acidic AA: Asp, Glu                           | 30          | 32          |
| hydrophobias AA: Ala, Ile, Leu, Phe, Trp, Val | 81          | 78          |
| polar AA: Asn, Cys, Gln, Ser, Thr, Tyr        | 100         | 101         |
| Isoelectric point: pH:                        | 8.571       | 8.941       |
| Charge at pH 7,0:                             | 2.920       | 5.364       |

**S4:**

## Sequence of the synthetic gene

| <b>Vol1:</b>                                                                                                                                                                                                                                                                                                                                                                                                                                                                                                                                                                                                                                                                                                                                                                                                                                                                                                                                                                                                                                                                                                                               |
|--------------------------------------------------------------------------------------------------------------------------------------------------------------------------------------------------------------------------------------------------------------------------------------------------------------------------------------------------------------------------------------------------------------------------------------------------------------------------------------------------------------------------------------------------------------------------------------------------------------------------------------------------------------------------------------------------------------------------------------------------------------------------------------------------------------------------------------------------------------------------------------------------------------------------------------------------------------------------------------------------------------------------------------------------------------------------------------------------------------------------------------------|
| CTCGGATCCAACCGCGTGGACGACTTTATTGATTACACTCAGCAGCAGAAAATTGCAGC<br>GGGCAAAGCTATCTCGGCGGACGCAATCCCGGGTGGCTCTGTAGATTATGACAATGGCC<br>CTGGTCCGGGTGGCAAACCGCAAGTATACGGCGTCCATACTGGTGAGGGCACCCTTAC<br>GAAAACGTTTCGCGTCGCCAACATGGGTCCCTGGTCCGGGAGCGGCGACGTTTTATACCA<br>CACTAAAGACATGCAGCTTTACTCCGGTCCGGTTGGCATGCAGACTCTGAGCAACGCGG<br>GTAAGGCGGACGCGACTGGTGTGCGAAGGCCCGGGTCCGGGTTCTACGCAGCAGCGCCAG<br>GGTTCCTCCGTGACCTCCTTGAGCGACACCGCAGCAACGCGCATTCCCTATCCTACCGAG<br>TCCCAGGGTCCGGGTCCCGGTGAAGGTTACTATTATGGCCCGAACGAAATCGTTAAGAA<br>ATTCCAAATCCACCACGTTGTGGCTATTGAACATGGAGGTGGCGGTCCGGGTCCGGGTG<br>TTTTTGGTCTGTACCGTCAAACACCCGCGAAAAGCTGAATAGCGCATATAACATGCCG<br>ACGATGCCGTATCTGTCTTCCACTGGTTATACTACCGCCGAAACCCTCGCGGCATACGGC<br>CCGGGTCCCTGGCTTCAGCCAGGGCGTGGCACTGCCTGACCCAGGTAAATACTATGGTCG<br>CGGTATCTACGGCGCTGCGGTCAACGGTCACCTGCCGCTCACCAAATCTGTAAACGTTTC<br>GGACTCCAAGCTGGAAGGTGTTAAAGTGGATAGCTACGAGCTGGGCTGGCGTGGCCCCG<br>GTCCGGGCCGTGGTAAACTCCGCGCTTACCCAGAATACTCATCTCTGTCTGTCTGTTCA<br>GAAAAGGTGTACGACGAGAAAGGTGAGTACCTGAAAGCCTGGACTGGTCCGGGCCAG<br>GTATGGATCGTTCCCGTGACCGTCTGCCTCCATTCGAAACCGAAACCCGCATCCTGCTCCA<br>GCTGCAGTAAGGTACCGTTCGAC |
| <b>Vol2:</b>                                                                                                                                                                                                                                                                                                                                                                                                                                                                                                                                                                                                                                                                                                                                                                                                                                                                                                                                                                                                                                                                                                                               |
| CTCGGATCCCTGCGTGACGATAGCGCCACTGGTAAAAAGACTACTGAAACTCAAAGCG<br>TATCTATCAAACAGAAAGCGGTGTTTATCGAAGGTCCTGGCCCAGGCTATGCACAGGC<br>CTTTCGCGCTCCTACCATGGGTGAGATGTACAATGATTCTAAGCATTCTCTATCGGTCG<br>CTTCTACACAAACTACTGGGTTCCGAACCCAAACCTGCGGCCAGAACTGGCCCCGGGTC<br>CTGGCGGCGACAACGTAATTGGTCAGACCGCTTCGGGTGCGTACATCCTGAAATGGCAA<br>AACGGCGGCAAAGCTCTGGTGGATGGTATCGAAGCGTCTATGTCGTTTGGTCCAGGCC<br>GGGTGGTATCGCCAAAGCATTTCGTGCCCCGTCCATCCGTGAAGTGTCCCCGGGGTTCG<br>GTACTCTGACCCAGGGTGGTGTAGCATCATGTACGGCAATGGCCCCGGGCCGGTAAA<br>GCACCCAACCTGTACCAATCCTCGGAAGGTTACCTGTTGTATTCCAAAGGTAACGGTTG<br>TCCGAAAGATATCACCTCTGGGGGCTGCTACCTGATCGGCAATAAGGACCTGGACCCAG<br>AAGGTCCGGGTCCCTGGCGTCGGAACCTTCGCGGACCGCAGCACTCACATTAGTTCTTCTT<br>ATAGCAAACAGCCGGGTTACGGAGTTAACGATTTCTACGTTTCCCTACGGTCCGGGCCCA<br>GGCAATATCTATGCTGGTGATACTCAAATTCCTCCTCCAGCGCCGTGACCGAATCTCTG<br>GCCAAGAGCGGCAAAGAAACCAACCGCCTGTACCGCCAGAACGGCCCCGGGCCGGGTC                                                                                                                                                                                                                                |

GCCGCAAAGCGATGATGAATCCCTGAACGGCAAGTCCCTTAAGGGCGAGCCGCTGGA  
ACGTACCCCGCGTCACGCGGCAAACGCAAACTGGAATGGGACTACACTGGCCCAGGTC  
CAGGTATGGATCGTAGCCGAGATCGTCTGCCACCGTTCGAACTGAAACGCGCATCCTGT  
TGCAGCTGCAGTAAGGTACCGTCGAC

**Supplemental Fig. S1:** Analysis of the vaccine proteins Vol1 and Vol2 with Garnier-Robson and Chou-Fasman ( $\alpha$ -;  $\beta$ -; turn-regions), Kyte Doolittle hydrophobicity plot and Jameson-Wolf (antigenic index). Newly simulated putative MHC-I and -II epitopes are indicated for each allele of the Balb/c mouse.

**Supplemental Fig. S2:** Analysis of the vaccine target proteins Usp, IutA, IroN, IreA, IhaA and ChuA plus the control proteins FepA and FhuA. Plots with Garnier-Robson and Chou-Fasman ( $\alpha$ ;  $\beta$ ; turn- regions), Kyte Doolittle (hydrophobicity) and Jameson-Wolf (antigenic index) as well as Emini (surface probability) and Karplus-Schulz ( $\alpha$ ;  $\beta$ ; flexible) are shown. Results of structure prediction algorithms Pred TMBB, PROFtmb, HMM-B2 TMR and TM-Beta are indicated for all proteins except Usp, which has no outer membrane portion. Putative MHC-I and -II epitopes are indicated for each allele of the Balb/c mouse and putative proteasome cleavage sites (Net Chop) are also marked. The subunits chosen for the vaccine protein are indicated as pink boxes and numbered according to the content of predicted epitopes.

**Supplemental Fig. S3:** Properties and amino acid composition of the vaccine proteins Vol1 and Vol2.

**Supplemental Fig. S4:** Nucleotide sequence of the synthetic gene used to express multi-epitope vaccine proteins Vol1 and Vol2.
